# Supplementary material for: The DNA barcode reveals cryptic diversity and a new record for the genus Leporinus (Characiformes, Anostomidae) in the hydrographic basins of central northern Brazil
Source: PeerJ. 2023 May 25;11:e15184. doi: 10.7717/peerj.15184 (PMC10225125; doi:10.7717/peerj.15184)
Supplement: Table S3 — Genetic distance, based on the Kimura 2-Parameter algorithm, for the genus Leporinus and Megaleporinus in the hydrographic basins of central northern Brazil. [file peerj-11-15184-s003.xlsx]

## Sheet: Matrix
			SPECIE		GENETIC DISTANCE
					1	2	3	4	5	6	7	8	9	10	11	12	13	14	15	16	17	18	19	20	21	22	23	24	25	26	27	28	29	30	31	32	33	34	35	36	37	38	39	40	41	42	43	44	45
			1	LEP01 Leporinus piau Itapecuru
			2	LEP02 Leporinus piau Itapecuru	0.0
			3	LEP03 Leporinus piau Itapecuru	0.0	0.0
			4	LEP05 Leporinus piau Itapecuru	0.0	0.0	0.0
			5	LEP06 Leporinus piau Itapecuru	0.0	0.0	0.0	0.0
			6	LEP07 Leporinus piau Itapecuru	0.0	0.0	0.0	0.0	0.0
			7	LEP08 Leporinus piau Itapecuru	0.0	0.0	0.0	0.0	0.0	0.0
			8	LEP11 Leporinus piau Itapecuru	0.0	0.0	0.0	0.0	0.0	0.0	0.0
			9	LEP12 Leporinus piau Itapecuru	0.0	0.0	0.0	0.0	0.0	0.0	0.0	0.0
			10	LEP15 Leporinus piau Itapecuru	0.0	0.0	0.0	0.0	0.0	0.0	0.0	0.0	0.0
			11	LEP16 Leporinus piau Itapecuru	0.0	0.0	0.0	0.0	0.0	0.0	0.0	0.0	0.0	0.0
			12	LEP17 Leporinus piau Itapecuru	0.0	0.0	0.0	0.0	0.0	0.0	0.0	0.0	0.0	0.0	0.0
			13	LEP18 Leporinus piau Itapecuru	0.0	0.0	0.0	0.0	0.0	0.0	0.0	0.0	0.0	0.0	0.0	0.0
			14	LEP19 Leporinus piau Itapecuru	0.0	0.0	0.0	0.0	0.0	0.0	0.0	0.0	0.0	0.0	0.0	0.0	0.0
			15	LEP20 Leporinus piau Itapecuru	0.0	0.0	0.0	0.0	0.0	0.0	0.0	0.0	0.0	0.0	0.0	0.0	0.0	0.0
			16	LEP21 Leporinus piau Itapecuru	0.0	0.0	0.0	0.0	0.0	0.0	0.0	0.0	0.0	0.0	0.0	0.0	0.0	0.0	0.0
			17	LEP23 Leporinus piau Itapecuru	0.16	0.16	0.16	0.16	0.16	0.16	0.16	0.16	0.16	0.16	0.16	0.16	0.16	0.16	0.16	0.16
			18	LEP25 Leporinus piau Itapecuru	0.0	0.0	0.0	0.0	0.0	0.0	0.0	0.0	0.0	0.0	0.0	0.0	0.0	0.0	0.0	0.0	0.16
			19	LEP29 Leporinus piau Itapecuru	0.0	0.0	0.0	0.0	0.0	0.0	0.0	0.0	0.0	0.0	0.0	0.0	0.0	0.0	0.0	0.0	0.16	0.0
			20	LEP28 Leporinus piau Itapecuru	0.0	0.0	0.0	0.0	0.0	0.0	0.0	0.0	0.0	0.0	0.0	0.0	0.0	0.0	0.0	0.0	0.16	0.0	0.0
			21	LEP30 Leporinus piau Itapecuru	0.48	0.48	0.48	0.48	0.48	0.48	0.48	0.48	0.48	0.48	0.48	0.48	0.48	0.48	0.48	0.48	0.65	0.48	0.48	0.48
			22	LEP45 Leporinus piau Itapecuru	0.0	0.0	0.0	0.0	0.0	0.0	0.0	0.0	0.0	0.0	0.0	0.0	0.0	0.0	0.0	0.0	0.0	0.0	0.0	0.0	0.48
			23	LEP46 Leporinus piau Itapecuru	0.16	0.16	0.16	0.16	0.16	0.16	0.16	0.16	0.16	0.16	0.16	0.16	0.16	0.16	0.16	0.16	0.32	0.16	0.16	0.16	0.65	0.16
			24	LEP47 Leporinus piau Itapecuru	0.0	0.0	0.0	0.0	0.0	0.0	0.0	0.0	0.0	0.0	0.0	0.0	0.0	0.0	0.0	0.0	0.0	0.0	0.0	0.0	0.48	0.0	0.16
			25	LEP48 Leporinus piau Itapecuru	0.16	0.16	0.16	0.16	0.16	0.16	0.16	0.16	0.16	0.16	0.16	0.16	0.16	0.16	0.16	0.16	0.32	0.16	0.16	0.16	0.65	0.16	0.0	0.16
			26	LEP49 Leporinus piau Itapecuru	0.16	0.16	0.16	0.16	0.16	0.16	0.16	0.16	0.16	0.16	0.16	0.16	0.16	0.16	0.16	0.16	0.0	0.16	0.16	0.16	0.65	0.16	0.32	0.16	0.32
			27	LEP50 Leporinus piau Itapecuru	0.0	0.0	0.0	0.0	0.0	0.0	0.0	0.0	0.0	0.0	0.0	0.0	0.0	0.0	0.0	0.0	0.0	0.0	0.0	0.0	0.48	0.0	0.16	0.0	0.16	0.16
			28	LEP51 Leporinus piau Itapecuru	3.76	3.76	3.76	3.76	3.76	3.76	3.76	3.76	3.76	3.76	3.76	3.76	3.76	3.76	3.76	3.76	3.84	3.76	3.76	3.76	3.33	3.76	3.85	3.76	3.85	3.84	3.76
			29	LEP53 Leporinus piau Itapecuru	0.0	0.0	0.0	0.0	0.0	0.0	0.0	0.0	0.0	0.0	0.0	0.0	0.0	0.0	0.0	0.0	0.0	0.0	0.0	0.0	0.48	0.0	0.16	0.0	0.16	0.16	0.0	3.76
			30	LEP78 Leporinus piau Itapecuru	0.0	0.0	0.0	0.0	0.0	0.0	0.0	0.0	0.0	0.0	0.0	0.0	0.0	0.0	0.0	0.0	0.0	0.0	0.0	0.0	0.48	0.0	0.16	0.0	0.16	0.16	0.0	3.76	0.0
			31	LEP62 Leporinus piau Itapecuru	3.76	3.76	3.76	3.76	3.76	3.76	3.76	3.76	3.76	3.76	3.76	3.76	3.76	3.76	3.76	3.76	3.84	3.76	3.76	3.76	3.33	3.76	3.85	3.76	3.85	3.84	3.76	0.0	3.76	3.76
			32	LEP67 Leporinus piau Itapecuru	0.98	0.98	0.98	0.98	0.98	0.98	0.98	0.98	0.98	0.98	0.98	0.98	0.98	0.98	0.98	0.98	1.14	0.98	0.98	0.98	1.14	0.98	1.14	0.98	1.14	1.14	0.98	2.64	0.98	0.98	2.64
			33	LEP68 Leporinus piau Itapecuru	3.85	3.85	3.85	3.85	3.85	3.85	3.85	3.85	3.85	3.85	3.85	3.85	3.85	3.85	3.85	3.85	4.02	3.85	3.85	3.85	3.50	3.85	4.02	3.85	4.02	4.02	3.85	0.16	3.85	3.85	0.16	2.82
			34	LEP79 Leporinus piau Itapecuru	3.76	3.76	3.76	3.76	3.76	3.76	3.76	3.76	3.76	3.76	3.76	3.76	3.76	3.76	3.76	3.76	3.84	3.76	3.76	3.76	3.33	3.76	3.85	3.76	3.85	3.84	3.76	0.0	3.76	3.76	0.0	2.64	0.16
			35	LEP80 Leporinus piau Itapecuru	0.0	0.0	0.0	0.0	0.0	0.0	0.0	0.0	0.0	0.0	0.0	0.0	0.0	0.0	0.0	0.0	0.0	0.0	0.0	0.0	0.48	0.0	0.16	0.0	0.16	0.16	0.0	3.76	0.0	0.0	3.76	0.98	3.85	3.76
			36	MF664226 Leporinus cf friderici Mearim	3.73	3.73	3.73	3.73	3.73	3.73	3.73	3.73	3.73	3.73	3.73	3.73	3.73	3.73	3.73	3.73	3.90	3.73	3.73	3.73	3.38	3.73	3.90	3.73	3.90	3.90	3.73	0.32	3.73	3.73	0.32	2.68	0.50	0.32	3.73
			37	PER70 Leporinus piau Pericuma	4.05	4.05	4.05	4.05	4.05	4.05	4.05	4.05	4.05	4.05	4.05	4.05	4.05	4.05	4.05	4.05	4.05	4.05	4.05	4.05	3.69	4.05	4.23	4.05	4.23	4.05	4.05	0.16	4.05	4.05	0.16	2.96	0.34	0.16	4.05	0.52
			38	PER71 Leporinus piau Pericuma	3.76	3.76	3.76	3.76	3.76	3.76	3.76	3.76	3.76	3.76	3.76	3.76	3.76	3.76	3.76	3.76	3.84	3.76	3.76	3.76	3.33	3.76	3.85	3.76	3.85	3.84	3.76	0.0	3.76	3.76	0.0	2.64	0.16	0.0	3.76	0.32	0.16
			39	PER66 Leporinus piau Pericuma	3.76	3.76	3.76	3.76	3.76	3.76	3.76	3.76	3.76	3.76	3.76	3.76	3.76	3.76	3.76	3.76	3.84	3.76	3.76	3.76	3.33	3.76	3.85	3.76	3.85	3.84	3.76	0.0	3.76	3.76	0.0	2.64	0.16	0.0	3.76	0.32	0.16	0.0
			40	PER67 Leporinus piau Pericuma	3.76	3.76	3.76	3.76	3.76	3.76	3.76	3.76	3.76	3.76	3.76	3.76	3.76	3.76	3.76	3.76	3.84	3.76	3.76	3.76	3.33	3.76	3.85	3.76	3.85	3.84	3.76	0.0	3.76	3.76	0.0	2.64	0.16	0.0	3.76	0.32	0.16	0.0	0.0
			41	PER68 Leporinus piau Pericuma	3.76	3.76	3.76	3.76	3.76	3.76	3.76	3.76	3.76	3.76	3.76	3.76	3.76	3.76	3.76	3.76	3.84	3.76	3.76	3.76	3.33	3.76	3.85	3.76	3.85	3.84	3.76	0.0	3.76	3.76	0.0	2.64	0.16	0.0	3.76	0.32	0.16	0.0	0.0	0.0
			42	PER69 Leporinus piau Pericuma	3.76	3.76	3.76	3.76	3.76	3.76	3.76	3.76	3.76	3.76	3.76	3.76	3.76	3.76	3.76	3.76	3.84	3.76	3.76	3.76	3.33	3.76	3.85	3.76	3.85	3.84	3.76	0.0	3.76	3.76	0.0	2.64	0.16	0.0	3.76	0.32	0.16	0.0	0.0	0.0	0.0
			43	PER160 Leporinus piau Pericuma	3.76	3.76	3.76	3.76	3.76	3.76	3.76	3.76	3.76	3.76	3.76	3.76	3.76	3.76	3.76	3.76	3.84	3.76	3.76	3.76	3.33	3.76	3.85	3.76	3.85	3.84	3.76	0.0	3.76	3.76	0.0	2.64	0.16	0.0	3.76	0.32	0.16	0.0	0.0	0.0	0.0	0.0
			44	PER161 Leporinus piau Pericuma	3.76	3.76	3.76	3.76	3.76	3.76	3.76	3.76	3.76	3.76	3.76	3.76	3.76	3.76	3.76	3.76	3.84	3.76	3.76	3.76	3.33	3.76	3.85	3.76	3.85	3.84	3.76	0.0	3.76	3.76	0.0	2.64	0.16	0.0	3.76	0.32	0.16	0.0	0.0	0.0	0.0	0.0	0.0
			45	PER162 Leporinus piau Pericuma	3.76	3.76	3.76	3.76	3.76	3.76	3.76	3.76	3.76	3.76	3.76	3.76	3.76	3.76	3.76	3.76	3.84	3.76	3.76	3.76	3.33	3.76	3.85	3.76	3.85	3.84	3.76	0.0	3.76	3.76	0.0	2.64	0.16	0.0	3.76	0.32	0.16	0.0	0.0	0.0	0.0	0.0	0.0	0.0
			46	PER163 Leporinus piau Pericuma	3.76	3.76	3.76	3.76	3.76	3.76	3.76	3.76	3.76	3.76	3.76	3.76	3.76	3.76	3.76	3.76	3.84	3.76	3.76	3.76	3.33	3.76	3.85	3.76	3.85	3.84	3.76	0.0	3.76	3.76	0.0	2.64	0.16	0.0	3.76	0.32	0.16	0.0	0.0	0.0	0.0	0.0	0.0	0.0	0.0
			47	PER164 Leporinus piau Pericuma	3.76	3.76	3.76	3.76	3.76	3.76	3.76	3.76	3.76	3.76	3.76	3.76	3.76	3.76	3.76	3.76	3.84	3.76	3.76	3.76	3.33	3.76	3.85	3.76	3.85	3.84	3.76	0.0	3.76	3.76	0.0	2.64	0.16	0.0	3.76	0.32	0.16	0.0	0.0	0.0	0.0	0.0	0.0	0.0	0.0
			48	LEP101 Leporinus piau Mearim	3.50	3.50	3.50	3.50	3.50	3.50	3.50	3.50	3.50	3.50	3.50	3.50	3.50	3.50	3.50	3.50	3.66	3.50	3.50	3.50	3.15	3.50	3.67	3.50	3.67	3.66	3.50	0.32	3.50	3.50	0.32	2.64	0.49	0.32	3.50	0.33	0.51	0.32	0.32	0.32	0.32	0.32	0.32	0.32	0.32
			49	LEP143 Leporinus piau Mearim	3.76	3.76	3.76	3.76	3.76	3.76	3.76	3.76	3.76	3.76	3.76	3.76	3.76	3.76	3.76	3.76	3.84	3.76	3.76	3.76	3.33	3.76	3.85	3.76	3.85	3.84	3.76	0.0	3.76	3.76	0.0	2.64	0.16	0.0	3.76	0.32	0.16	0.0	0.0	0.0	0.0	0.0	0.0	0.0	0.0
			50	LEP144 Leporinus piau Mearim	3.76	3.76	3.76	3.76	3.76	3.76	3.76	3.76	3.76	3.76	3.76	3.76	3.76	3.76	3.76	3.76	3.84	3.76	3.76	3.76	3.33	3.76	3.85	3.76	3.85	3.84	3.76	0.32	3.76	3.76	0.32	2.64	0.48	0.32	3.76	0.0	0.51	0.32	0.32	0.32	0.32	0.32	0.32	0.32	0.32
			51	LEP145 Leporinus piau Mearim	3.76	3.76	3.76	3.76	3.76	3.76	3.76	3.76	3.76	3.76	3.76	3.76	3.76	3.76	3.76	3.76	3.84	3.76	3.76	3.76	3.33	3.76	3.85	3.76	3.85	3.84	3.76	0.0	3.76	3.76	0.0	2.64	0.16	0.0	3.76	0.32	0.16	0.0	0.0	0.0	0.0	0.0	0.0	0.0	0.0
			52	LEP147 Leporinus piau MZUEL10530 Mearim	3.76	3.76	3.76	3.76	3.76	3.76	3.76	3.76	3.76	3.76	3.76	3.76	3.76	3.76	3.76	3.76	3.84	3.76	3.76	3.76	3.33	3.76	3.85	3.76	3.85	3.84	3.76	0.32	3.76	3.76	0.32	2.64	0.48	0.32	3.76	0.0	0.51	0.32	0.32	0.32	0.32	0.32	0.32	0.32	0.32
			53	LEP148 Leporinus piau Mearim	3.76	3.76	3.76	3.76	3.76	3.76	3.76	3.76	3.76	3.76	3.76	3.76	3.76	3.76	3.76	3.76	3.84	3.76	3.76	3.76	3.33	3.76	3.85	3.76	3.85	3.84	3.76	0.0	3.76	3.76	0.0	2.64	0.16	0.0	3.76	0.32	0.16	0.0	0.0	0.0	0.0	0.0	0.0	0.0	0.0
			54	MEA55 Leporinus piau Mearim	3.76	3.76	3.76	3.76	3.76	3.76	3.76	3.76	3.76	3.76	3.76	3.76	3.76	3.76	3.76	3.76	3.84	3.76	3.76	3.76	3.33	3.76	3.85	3.76	3.85	3.84	3.76	0.0	3.76	3.76	0.0	2.64	0.16	0.0	3.76	0.32	0.16	0.0	0.0	0.0	0.0	0.0	0.0	0.0	0.0
			55	MEA56 Leporinus piau Mearim	3.85	3.85	3.85	3.85	3.85	3.85	3.85	3.85	3.85	3.85	3.85	3.85	3.85	3.85	3.85	3.85	4.02	3.85	3.85	3.85	3.50	3.85	4.02	3.85	4.02	4.02	3.85	0.16	3.85	3.85	0.16	2.82	0.0	0.16	3.85	0.50	0.34	0.16	0.16	0.16	0.16	0.16	0.16	0.16	0.16
			56	MEA57 Leporinus piau Mearim	3.76	3.76	3.76	3.76	3.76	3.76	3.76	3.76	3.76	3.76	3.76	3.76	3.76	3.76	3.76	3.76	3.84	3.76	3.76	3.76	3.33	3.76	3.85	3.76	3.85	3.84	3.76	0.32	3.76	3.76	0.32	2.64	0.48	0.32	3.76	0.0	0.51	0.32	0.32	0.32	0.32	0.32	0.32	0.32	0.32
			57	MEA58 Leporinus piau Mearim	0.16	0.16	0.16	0.16	0.16	0.16	0.16	0.16	0.16	0.16	0.16	0.16	0.16	0.16	0.16	0.16	0.32	0.16	0.16	0.16	0.65	0.16	0.32	0.16	0.32	0.32	0.16	3.50	0.16	0.16	3.50	0.81	3.76	3.50	0.16	3.55	3.87	3.50	3.50	3.50	3.50	3.50	3.50	3.50	3.50
			58	MEA59 Leporinus piau Mearim	3.76	3.76	3.76	3.76	3.76	3.76	3.76	3.76	3.76	3.76	3.76	3.76	3.76	3.76	3.76	3.76	3.84	3.76	3.76	3.76	3.33	3.76	3.85	3.76	3.85	3.84	3.76	0.32	3.76	3.76	0.32	2.64	0.48	0.32	3.76	0.0	0.51	0.32	0.32	0.32	0.32	0.32	0.32	0.32	0.32
			59	MEA60 Leporinus piau Mearim	3.76	3.76	3.76	3.76	3.76	3.76	3.76	3.76	3.76	3.76	3.76	3.76	3.76	3.76	3.76	3.76	3.84	3.76	3.76	3.76	3.33	3.76	3.85	3.76	3.85	3.84	3.76	0.0	3.76	3.76	0.0	2.64	0.16	0.0	3.76	0.32	0.16	0.0	0.0	0.0	0.0	0.0	0.0	0.0	0.0
			60	MEA61 Leporinus piau Mearin	3.76	3.76	3.76	3.76	3.76	3.76	3.76	3.76	3.76	3.76	3.76	3.76	3.76	3.76	3.76	3.76	3.84	3.76	3.76	3.76	3.33	3.76	3.85	3.76	3.85	3.84	3.76	0.32	3.76	3.76	0.32	2.64	0.48	0.32	3.76	0.0	0.51	0.32	0.32	0.32	0.32	0.32	0.32	0.32	0.32
			61	MEA63 Leporinus piau Mearim	3.76	3.76	3.76	3.76	3.76	3.76	3.76	3.76	3.76	3.76	3.76	3.76	3.76	3.76	3.76	3.76	3.84	3.76	3.76	3.76	3.33	3.76	3.85	3.76	3.85	3.84	3.76	0.0	3.76	3.76	0.0	2.64	0.16	0.0	3.76	0.32	0.16	0.0	0.0	0.0	0.0	0.0	0.0	0.0	0.0
			62	MEA64 Leporinus piau Mearim	3.76	3.76	3.76	3.76	3.76	3.76	3.76	3.76	3.76	3.76	3.76	3.76	3.76	3.76	3.76	3.76	3.84	3.76	3.76	3.76	3.33	3.76	3.85	3.76	3.85	3.84	3.76	0.32	3.76	3.76	0.32	2.64	0.48	0.32	3.76	0.32	0.34	0.32	0.32	0.32	0.32	0.32	0.32	0.32	0.32
			63	MEA65 Leporinus piau Mearim	3.50	3.50	3.50	3.50	3.50	3.50	3.50	3.50	3.50	3.50	3.50	3.50	3.50	3.50	3.50	3.50	3.67	3.50	3.50	3.50	3.16	3.50	3.76	3.50	3.76	3.67	3.50	0.16	3.50	3.50	0.16	2.48	0.32	0.16	3.50	0.16	0.34	0.16	0.16	0.16	0.16	0.16	0.16	0.16	0.16
			64	MEA66 Leporinus piau Mearim	3.50	3.50	3.50	3.50	3.50	3.50	3.50	3.50	3.50	3.50	3.50	3.50	3.50	3.50	3.50	3.50	3.67	3.50	3.50	3.50	3.16	3.50	3.76	3.50	3.76	3.67	3.50	0.16	3.50	3.50	0.16	2.48	0.32	0.16	3.50	0.16	0.34	0.16	0.16	0.16	0.16	0.16	0.16	0.16	0.16
			65	MEA99 Leporinus piau Mearim	3.76	3.76	3.76	3.76	3.76	3.76	3.76	3.76	3.76	3.76	3.76	3.76	3.76	3.76	3.76	3.76	3.84	3.76	3.76	3.76	3.33	3.76	3.85	3.76	3.85	3.84	3.76	0.32	3.76	3.76	0.32	2.64	0.48	0.32	3.76	0.32	0.34	0.32	0.32	0.32	0.32	0.32	0.32	0.32	0.32
			66	MEA100 Leporinus piau Mearim	4.52	4.52	4.52	4.52	4.52	4.52	4.52	4.52	4.52	4.52	4.52	4.52	4.52	4.52	4.52	4.52	4.69	4.52	4.52	4.52	4.17	4.52	4.69	4.52	4.69	4.69	4.52	1.14	4.52	4.52	1.14	3.65	0.97	1.14	4.52	1.49	1.19	1.14	1.14	1.14	1.14	1.14	1.14	1.14	1.14
			67	MEA349 Leporinus piau Mearim	3.50	3.50	3.50	3.50	3.50	3.50	3.50	3.50	3.50	3.50	3.50	3.50	3.50	3.50	3.50	3.50	3.67	3.50	3.50	3.50	3.16	3.50	3.76	3.50	3.76	3.67	3.50	0.16	3.50	3.50	0.16	2.48	0.32	0.16	3.50	0.16	0.34	0.16	0.16	0.16	0.16	0.16	0.16	0.16	0.16
			68	MEA350 Leporinus piau Mearim	3.50	3.50	3.50	3.50	3.50	3.50	3.50	3.50	3.50	3.50	3.50	3.50	3.50	3.50	3.50	3.50	3.67	3.50	3.50	3.50	3.16	3.50	3.76	3.50	3.76	3.67	3.50	0.16	3.50	3.50	0.16	2.48	0.32	0.16	3.50	0.16	0.34	0.16	0.16	0.16	0.16	0.16	0.16	0.16	0.16
			69	MEA351 Leporinus piau Mearim	3.50	3.50	3.50	3.50	3.50	3.50	3.50	3.50	3.50	3.50	3.50	3.50	3.50	3.50	3.50	3.50	3.67	3.50	3.50	3.50	3.16	3.50	3.76	3.50	3.76	3.67	3.50	0.16	3.50	3.50	0.16	2.48	0.32	0.16	3.50	0.16	0.34	0.16	0.16	0.16	0.16	0.16	0.16	0.16	0.16
			70	MEA352 Leporinus piau Mearim	0.0	0.0	0.0	0.0	0.0	0.0	0.0	0.0	0.0	0.0	0.0	0.0	0.0	0.0	0.0	0.0	0.16	0.0	0.0	0.0	0.48	0.0	0.16	0.0	0.16	0.16	0.0	3.76	0.0	0.0	3.76	0.98	3.85	3.76	0.0	3.73	4.05	3.76	3.76	3.76	3.76	3.76	3.76	3.76	3.76
			71	MEA353 Leporinus piau Mearim	0.0	0.0	0.0	0.0	0.0	0.0	0.0	0.0	0.0	0.0	0.0	0.0	0.0	0.0	0.0	0.0	0.16	0.0	0.0	0.0	0.48	0.0	0.16	0.0	0.16	0.16	0.0	3.76	0.0	0.0	3.76	0.98	3.85	3.76	0.0	3.73	4.05	3.76	3.76	3.76	3.76	3.76	3.76	3.76	3.76
			72	MEA492 Leporinus piau Mearim	0.0	0.0	0.0	0.0	0.0	0.0	0.0	0.0	0.0	0.0	0.0	0.0	0.0	0.0	0.0	0.0	0.16	0.0	0.0	0.0	0.48	0.0	0.16	0.0	0.16	0.16	0.0	3.76	0.0	0.0	3.76	0.98	3.85	3.76	0.0	3.73	4.05	3.76	3.76	3.76	3.76	3.76	3.76	3.76	3.76
			73	MEA493 Leporinus piau Mearim	3.50	3.50	3.50	3.50	3.50	3.50	3.50	3.50	3.50	3.50	3.50	3.50	3.50	3.50	3.50	3.50	3.67	3.50	3.50	3.50	3.16	3.50	3.76	3.50	3.76	3.67	3.50	0.16	3.50	3.50	0.16	2.48	0.32	0.16	3.50	0.16	0.34	0.16	0.16	0.16	0.16	0.16	0.16	0.16	0.16
			74	MAE495 Leporinus piau Mearim	3.76	3.76	3.76	3.76	3.76	3.76	3.76	3.76	3.76	3.76	3.76	3.76	3.76	3.76	3.76	3.76	3.84	3.76	3.76	3.76	3.33	3.76	3.85	3.76	3.85	3.84	3.76	0.0	3.76	3.76	0.0	2.64	0.16	0.0	3.76	0.32	0.16	0.0	0.0	0.0	0.0	0.0	0.0	0.0	0.0
			75	MEA494 Leporinus piau Mearim	0.0	0.0	0.0	0.0	0.0	0.0	0.0	0.0	0.0	0.0	0.0	0.0	0.0	0.0	0.0	0.0	0.16	0.0	0.0	0.0	0.48	0.0	0.16	0.0	0.16	0.16	0.0	3.76	0.0	0.0	3.76	0.98	3.85	3.76	0.0	3.73	4.05	3.76	3.76	3.76	3.76	3.76	3.76	3.76	3.76
			76	MEA496 Leporinus piau Mearim	0.16	0.16	0.16	0.16	0.16	0.16	0.16	0.16	0.16	0.16	0.16	0.16	0.16	0.16	0.16	0.16	0.32	0.16	0.16	0.16	0.65	0.16	0.32	0.16	0.32	0.32	0.16	3.50	0.16	0.16	3.50	0.81	3.76	3.50	0.16	3.55	3.87	3.50	3.50	3.50	3.50	3.50	3.50	3.50	3.50
			77	MEA497 Leporinus piau Mearim	0.0	0.0	0.0	0.0	0.0	0.0	0.0	0.0	0.0	0.0	0.0	0.0	0.0	0.0	0.0	0.0	0.16	0.0	0.0	0.0	0.48	0.0	0.16	0.0	0.16	0.16	0.0	3.76	0.0	0.0	3.76	0.98	3.85	3.76	0.0	3.73	4.05	3.76	3.76	3.76	3.76	3.76	3.76	3.76	3.76
			78	LEP112 Leporinus piau Mearim	3.85	3.85	3.85	3.85	3.85	3.85	3.85	3.85	3.85	3.85	3.85	3.85	3.85	3.85	3.85	3.85	4.02	3.85	3.85	3.85	3.50	3.85	4.02	3.85	4.02	4.02	3.85	0.16	3.85	3.85	0.16	2.82	0.32	0.16	3.85	0.50	0.16	0.16	0.16	0.16	0.16	0.16	0.16	0.16	0.16
			79	LEP113 Leporinus piau Mearim	3.76	3.76	3.76	3.76	3.76	3.76	3.76	3.76	3.76	3.76	3.76	3.76	3.76	3.76	3.76	3.76	3.84	3.76	3.76	3.76	3.33	3.76	3.85	3.76	3.85	3.84	3.76	0.0	3.76	3.76	0.0	2.64	0.16	0.0	3.76	0.32	0.16	0.0	0.0	0.0	0.0	0.0	0.0	0.0	0.0
			80	LEP114 Leporinus piau Mearim	3.76	3.76	3.76	3.76	3.76	3.76	3.76	3.76	3.76	3.76	3.76	3.76	3.76	3.76	3.76	3.76	3.84	3.76	3.76	3.76	3.33	3.76	3.85	3.76	3.85	3.84	3.76	0.0	3.76	3.76	0.0	2.64	0.16	0.0	3.76	0.32	0.16	0.0	0.0	0.0	0.0	0.0	0.0	0.0	0.0
			81	LEP116 Leporinus piau Mearim	3.76	3.76	3.76	3.76	3.76	3.76	3.76	3.76	3.76	3.76	3.76	3.76	3.76	3.76	3.76	3.76	3.84	3.76	3.76	3.76	3.33	3.76	3.85	3.76	3.85	3.84	3.76	0.0	3.76	3.76	0.0	2.64	0.16	0.0	3.76	0.32	0.16	0.0	0.0	0.0	0.0	0.0	0.0	0.0	0.0
			82	LEP115 Leporinus piau Mearim	0.0	0.0	0.0	0.0	0.0	0.0	0.0	0.0	0.0	0.0	0.0	0.0	0.0	0.0	0.0	0.0	0.16	0.0	0.0	0.0	0.48	0.0	0.16	0.0	0.16	0.16	0.0	3.76	0.0	0.0	3.76	0.98	3.85	3.76	0.0	3.73	4.05	3.76	3.76	3.76	3.76	3.76	3.76	3.76	3.76
			83	LEP119 Leporinus piau Mearim	3.76	3.76	3.76	3.76	3.76	3.76	3.76	3.76	3.76	3.76	3.76	3.76	3.76	3.76	3.76	3.76	3.84	3.76	3.76	3.76	3.33	3.76	3.85	3.76	3.85	3.84	3.76	0.0	3.76	3.76	0.0	2.64	0.16	0.0	3.76	0.32	0.16	0.0	0.0	0.0	0.0	0.0	0.0	0.0	0.0
			84	LEP120 Leporinus piau Mearim	3.76	3.76	3.76	3.76	3.76	3.76	3.76	3.76	3.76	3.76	3.76	3.76	3.76	3.76	3.76	3.76	3.84	3.76	3.76	3.76	3.33	3.76	3.85	3.76	3.85	3.84	3.76	0.0	3.76	3.76	0.0	2.64	0.16	0.0	3.76	0.32	0.16	0.0	0.0	0.0	0.0	0.0	0.0	0.0	0.0
			85	LEP121 Leporinus piau Mearim	3.76	3.76	3.76	3.76	3.76	3.76	3.76	3.76	3.76	3.76	3.76	3.76	3.76	3.76	3.76	3.76	3.84	3.76	3.76	3.76	3.33	3.76	3.85	3.76	3.85	3.84	3.76	0.32	3.76	3.76	0.32	2.64	0.48	0.32	3.76	0.32	0.16	0.32	0.32	0.32	0.32	0.32	0.32	0.32	0.32
			86	LEP122 Leporinus piau Mearim	3.76	3.76	3.76	3.76	3.76	3.76	3.76	3.76	3.76	3.76	3.76	3.76	3.76	3.76	3.76	3.76	3.84	3.76	3.76	3.76	3.33	3.76	3.85	3.76	3.85	3.84	3.76	0.32	3.76	3.76	0.32	2.64	0.48	0.32	3.76	0.0	0.51	0.32	0.32	0.32	0.32	0.32	0.32	0.32	0.32
			87	LEP123 Leporinus piau Mearim	3.50	3.50	3.50	3.50	3.50	3.50	3.50	3.50	3.50	3.50	3.50	3.50	3.50	3.50	3.50	3.50	3.67	3.50	3.50	3.50	3.16	3.50	3.76	3.50	3.76	3.67	3.50	0.16	3.50	3.50	0.16	2.48	0.32	0.16	3.50	0.16	0.34	0.16	0.16	0.16	0.16	0.16	0.16	0.16	0.16
			88	LEP124 Leporinus piau Mearim	3.76	3.76	3.76	3.76	3.76	3.76	3.76	3.76	3.76	3.76	3.76	3.76	3.76	3.76	3.76	3.76	3.84	3.76	3.76	3.76	3.33	3.76	3.85	3.76	3.85	3.84	3.76	0.32	3.76	3.76	0.32	2.64	0.48	0.32	3.76	0.0	0.51	0.32	0.32	0.32	0.32	0.32	0.32	0.32	0.32
			89	LEP125 Leporinus piau Mearim	3.76	3.76	3.76	3.76	3.76	3.76	3.76	3.76	3.76	3.76	3.76	3.76	3.76	3.76	3.76	3.76	3.84	3.76	3.76	3.76	3.33	3.76	3.85	3.76	3.85	3.84	3.76	0.0	3.76	3.76	0.0	2.64	0.16	0.0	3.76	0.32	0.16	0.0	0.0	0.0	0.0	0.0	0.0	0.0	0.0
			90	LEP126 Leporinus piau Mearim	3.76	3.76	3.76	3.76	3.76	3.76	3.76	3.76	3.76	3.76	3.76	3.76	3.76	3.76	3.76	3.76	3.84	3.76	3.76	3.76	3.33	3.76	3.85	3.76	3.85	3.84	3.76	0.0	3.76	3.76	0.0	2.64	0.16	0.0	3.76	0.32	0.16	0.0	0.0	0.0	0.0	0.0	0.0	0.0	0.0
			91	LEP127 Leporinus piau Mearim	3.76	3.76	3.76	3.76	3.76	3.76	3.76	3.76	3.76	3.76	3.76	3.76	3.76	3.76	3.76	3.76	3.84	3.76	3.76	3.76	3.33	3.76	3.85	3.76	3.85	3.84	3.76	0.32	3.76	3.76	0.32	2.64	0.48	0.32	3.76	0.0	0.51	0.32	0.32	0.32	0.32	0.32	0.32	0.32	0.32
			92	LEP129 Leporinus piau Mearim	4.70	4.70	4.70	4.70	4.70	4.70	4.70	4.70	4.70	4.70	4.70	4.70	4.70	4.70	4.70	4.70	4.87	4.70	4.70	4.70	4.35	4.70	4.88	4.70	4.88	4.87	4.70	1.14	4.70	4.70	1.14	3.67	1.30	1.14	4.70	1.49	1.19	1.14	1.14	1.14	1.14	1.14	1.14	1.14	1.14
			93	LEP130 Leporinus piau Mearim	3.76	3.76	3.76	3.76	3.76	3.76	3.76	3.76	3.76	3.76	3.76	3.76	3.76	3.76	3.76	3.76	3.84	3.76	3.76	3.76	3.33	3.76	3.85	3.76	3.85	3.84	3.76	0.32	3.76	3.76	0.32	2.64	0.48	0.32	3.76	0.0	0.51	0.32	0.32	0.32	0.32	0.32	0.32	0.32	0.32
			94	LEP131 Leporinus piau MZUEL10531 Mearim	3.50	3.50	3.50	3.50	3.50	3.50	3.50	3.50	3.50	3.50	3.50	3.50	3.50	3.50	3.50	3.50	3.67	3.50	3.50	3.50	3.16	3.50	3.76	3.50	3.76	3.67	3.50	0.16	3.50	3.50	0.16	2.48	0.32	0.16	3.50	0.16	0.34	0.16	0.16	0.16	0.16	0.16	0.16	0.16	0.16
			95	LEP132 Leporinus piau Mearim	4.18	4.18	4.18	4.18	4.18	4.18	4.18	4.18	4.18	4.18	4.18	4.18	4.18	4.18	4.18	4.18	4.35	4.18	4.18	4.18	3.84	4.18	4.36	4.18	4.36	4.35	4.18	0.48	4.18	4.18	0.48	3.15	0.65	0.48	4.18	0.82	0.16	0.48	0.48	0.48	0.48	0.48	0.48	0.48	0.48
			96	LEP133 Leporinus piau Mearim	3.84	3.84	3.84	3.84	3.84	3.84	3.84	3.84	3.84	3.84	3.84	3.84	3.84	3.84	3.84	3.84	4.01	3.84	3.84	3.84	3.50	3.84	4.02	3.84	4.02	4.01	3.84	0.16	3.84	3.84	0.16	2.81	0.32	0.16	3.84	0.32	0.34	0.16	0.16	0.16	0.16	0.16	0.16	0.16	0.16
			97	LEP134 Leporinus piau Mearim	3.76	3.76	3.76	3.76	3.76	3.76	3.76	3.76	3.76	3.76	3.76	3.76	3.76	3.76	3.76	3.76	3.84	3.76	3.76	3.76	3.33	3.76	3.85	3.76	3.85	3.84	3.76	0.0	3.76	3.76	0.0	2.64	0.16	0.0	3.76	0.32	0.16	0.0	0.0	0.0	0.0	0.0	0.0	0.0	0.0
			98	LEP136 Leporinus piau Mearim	3.76	3.76	3.76	3.76	3.76	3.76	3.76	3.76	3.76	3.76	3.76	3.76	3.76	3.76	3.76	3.76	3.84	3.76	3.76	3.76	3.33	3.76	3.85	3.76	3.85	3.84	3.76	0.32	3.76	3.76	0.32	2.64	0.48	0.32	3.76	0.0	0.51	0.32	0.32	0.32	0.32	0.32	0.32	0.32	0.32
			99	LEP137 Leporinus piau Mearim	3.76	3.76	3.76	3.76	3.76	3.76	3.76	3.76	3.76	3.76	3.76	3.76	3.76	3.76	3.76	3.76	3.84	3.76	3.76	3.76	3.33	3.76	3.85	3.76	3.85	3.84	3.76	0.32	3.76	3.76	0.32	2.64	0.48	0.32	3.76	0.0	0.51	0.32	0.32	0.32	0.32	0.32	0.32	0.32	0.32
			100	LEP138 Leporinus piau Mearim	4.02	4.02	4.02	4.02	4.02	4.02	4.02	4.02	4.02	4.02	4.02	4.02	4.02	4.02	4.02	4.02	4.18	4.02	4.02	4.02	3.67	4.02	4.20	4.02	4.20	4.18	4.02	0.32	4.02	4.02	0.32	2.98	0.49	0.32	4.02	0.66	0.16	0.32	0.32	0.32	0.32	0.32	0.32	0.32	0.32
			101	LEP139 Leporinus piau Mearim	3.76	3.76	3.76	3.76	3.76	3.76	3.76	3.76	3.76	3.76	3.76	3.76	3.76	3.76	3.76	3.76	3.84	3.76	3.76	3.76	3.33	3.76	3.85	3.76	3.85	3.84	3.76	0.32	3.76	3.76	0.32	2.64	0.48	0.32	3.76	0.0	0.51	0.32	0.32	0.32	0.32	0.32	0.32	0.32	0.32
			102	LEP141 Leporinus piau Mearim	5.71	5.71	5.71	5.71	5.71	5.71	5.71	5.71	5.71	5.71	5.71	5.71	5.71	5.71	5.71	5.71	5.88	5.71	5.71	5.71	5.36	5.71	5.88	5.71	5.88	5.88	5.71	3.12	5.71	5.71	3.12	4.83	0.33	3.12	5.71	2.84	0.35	3.12	3.12	3.12	3.12	3.12	3.12	3.12	3.12
			103	LEP142 Leporinus piau Mearim	3.76	3.76	3.76	3.76	3.76	3.76	3.76	3.76	3.76	3.76	3.76	3.76	3.76	3.76	3.76	3.76	3.84	3.76	3.76	3.76	3.33	3.76	3.85	3.76	3.85	3.84	3.76	0.0	3.76	3.76	0.0	2.64	0.16	0.0	3.76	0.32	0.16	0.0	0.0	0.0	0.0	0.0	0.0	0.0	0.0
			104	COR01 Leporinus piau Mearim	3.50	3.50	3.50	3.50	3.50	3.50	3.50	3.50	3.50	3.50	3.50	3.50	3.50	3.50	3.50	3.50	3.67	3.50	3.50	3.50	3.16	3.50	3.76	3.50	3.76	3.67	3.50	0.16	3.50	3.50	0.16	2.48	0.32	0.16	3.50	0.16	0.34	0.16	0.16	0.16	0.16	0.16	0.16	0.16	0.16
			105	COR02 Leporinus piau Mearim	3.50	3.50	3.50	3.50	3.50	3.50	3.50	3.50	3.50	3.50	3.50	3.50	3.50	3.50	3.50	3.50	3.67	3.50	3.50	3.50	3.16	3.50	3.76	3.50	3.76	3.67	3.50	0.16	3.50	3.50	0.16	2.48	0.32	0.16	3.50	0.16	0.34	0.16	0.16	0.16	0.16	0.16	0.16	0.16	0.16
			106	COR03 Leporinus piau Mearim	3.76	3.76	3.76	3.76	3.76	3.76	3.76	3.76	3.76	3.76	3.76	3.76	3.76	3.76	3.76	3.76	3.84	3.76	3.76	3.76	3.33	3.76	3.85	3.76	3.85	3.84	3.76	0.0	3.76	3.76	0.0	2.64	0.16	0.0	3.76	0.32	0.16	0.0	0.0	0.0	0.0	0.0	0.0	0.0	0.0
			107	COR04 Leporinus piau Mearim	3.76	3.76	3.76	3.76	3.76	3.76	3.76	3.76	3.76	3.76	3.76	3.76	3.76	3.76	3.76	3.76	3.84	3.76	3.76	3.76	3.33	3.76	3.85	3.76	3.85	3.84	3.76	0.32	3.76	3.76	0.32	2.64	0.48	0.32	3.76	0.0	0.51	0.32	0.32	0.32	0.32	0.32	0.32	0.32	0.32
			108	COR05 Leporinus piau Mearim	0.0	0.0	0.0	0.0	0.0	0.0	0.0	0.0	0.0	0.0	0.0	0.0	0.0	0.0	0.0	0.0	0.16	0.0	0.0	0.0	0.48	0.0	0.16	0.0	0.16	0.16	0.0	3.76	0.0	0.0	3.76	0.98	3.85	3.76	0.0	3.73	4.05	3.76	3.76	3.76	3.76	3.76	3.76	3.76	3.76
			109	MF664285 Leporinus piau Jaguaribe	3.55	3.55	3.55	3.55	3.55	3.55	3.55	3.55	3.55	3.55	3.55	3.55	3.55	3.55	3.55	3.55	3.72	3.55	3.55	3.55	3.20	3.55	3.38	3.55	3.38	3.72	3.55	1.49	3.55	3.55	1.49	3.20	1.66	1.49	3.55	1.49	1.57	1.49	1.49	1.49	1.49	1.49	1.49	1.49	1.49
			110	KF568986 Leporinus lacustris Tiete	3.73	3.73	3.73	3.73	3.73	3.73	3.73	3.73	3.73	3.73	3.73	3.73	3.73	3.73	3.73	3.73	3.90	3.73	3.73	3.73	3.38	3.73	3.90	3.73	3.90	3.90	3.73	2.00	3.73	3.73	2.00	3.03	2.17	2.00	3.73	2.00	2.29	2.00	2.00	2.00	2.00	2.00	2.00	2.00	2.00
			111	KF568985 Leporinus lacustris Cuiaba	3.90	3.90	3.90	3.90	3.90	3.90	3.90	3.90	3.90	3.90	3.90	3.90	3.90	3.90	3.90	3.90	4.08	3.90	3.90	3.90	3.55	3.90	4.08	3.90	4.08	4.08	3.90	2.17	3.90	3.90	2.17	3.20	2.34	2.17	3.90	2.17	2.47	2.17	2.17	2.17	2.17	2.17	2.17	2.17	2.17
			112	JN988998 Leporinus lacustris Parana	4.06	4.06	4.06	4.06	4.06	4.06	4.06	4.06	4.06	4.06	4.06	4.06	4.06	4.06	4.06	4.06	4.25	4.06	4.06	4.06	3.68	4.06	4.25	4.06	4.25	4.25	4.06	2.18	4.06	4.06	2.18	3.10	2.36	2.18	4.06	2.18	2.50	2.18	2.18	2.18	2.18	2.18	2.18	2.18	2.18
			113	JN988997 Leporinus lacustris Parana	3.85	3.85	3.85	3.85	3.85	3.85	3.85	3.85	3.85	3.85	3.85	3.85	3.85	3.85	3.85	3.85	4.02	3.85	3.85	3.85	3.50	3.85	4.02	3.85	4.02	4.02	3.85	2.14	3.85	3.85	2.14	3.16	2.31	2.14	3.85	2.00	2.43	2.14	2.14	2.14	2.14	2.14	2.14	2.14	2.14
			114	JN988996 Leporinus lacustris Parana	3.85	3.85	3.85	3.85	3.85	3.85	3.85	3.85	3.85	3.85	3.85	3.85	3.85	3.85	3.85	3.85	4.02	3.85	3.85	3.85	3.50	3.85	4.02	3.85	4.02	4.02	3.85	2.14	3.85	3.85	2.14	3.16	2.31	2.14	3.85	2.00	2.43	2.14	2.14	2.14	2.14	2.14	2.14	2.14	2.14
			115	JN988995 Leporinus lacustris Parana	4.67	4.67	4.67	4.67	4.67	4.67	4.67	4.67	4.67	4.67	4.67	4.67	4.67	4.67	4.67	4.67	4.48	4.67	4.67	4.67	4.28	4.67	4.87	4.67	4.87	4.48	4.67	2.75	4.67	4.67	2.75	3.70	2.94	2.75	4.67	2.75	2.49	2.75	2.75	2.75	2.75	2.75	2.75	2.75	2.75
			116	JN988994 Leporinus lacustris Parana	4.18	4.18	4.18	4.18	4.18	4.18	4.18	4.18	4.18	4.18	4.18	4.18	4.18	4.18	4.18	4.18	4.18	4.18	4.18	4.18	3.80	4.18	4.37	4.18	4.37	4.18	4.18	2.14	4.18	4.18	2.14	3.24	2.32	2.14	4.18	2.14	2.34	2.14	2.14	2.14	2.14	2.14	2.14	2.14	2.14
			117	JN988993 Leporinus lacustris Parana	4.84	4.84	4.84	4.84	4.84	4.84	4.84	4.84	4.84	4.84	4.84	4.84	4.84	4.84	4.84	4.84	4.84	4.84	4.84	4.84	4.44	4.84	5.04	4.84	5.04	4.84	4.84	2.85	4.84	4.84	2.85	3.83	3.04	2.85	4.84	2.85	2.76	2.85	2.85	2.85	2.85	2.85	2.85	2.85	2.85
			118	JN988992 Leporinus lacustris Parana	4.63	4.63	4.63	4.63	4.63	4.63	4.63	4.63	4.63	4.63	4.63	4.63	4.63	4.63	4.63	4.63	4.63	4.63	4.63	4.63	4.24	4.63	4.82	4.63	4.82	4.63	4.63	2.91	4.63	4.63	2.91	4.05	3.10	2.91	4.63	2.96	2.91	2.91	2.91	2.91	2.91	2.91	2.91	2.91	2.91
			119	EU185566 Leporinus lacustris Parana	4.80	4.80	4.80	4.80	4.80	4.80	4.80	4.80	4.80	4.80	4.80	4.80	4.80	4.80	4.80	4.80	4.98	4.80	4.80	4.80	4.43	4.80	4.99	4.80	4.99	4.98	4.80	3.15	4.80	4.80	3.15	3.88	3.33	3.15	4.80	3.15	3.52	3.15	3.15	3.15	3.15	3.15	3.15	3.15	3.15
			120	TUR34 Leporinus piau Turiacu	1.47	1.47	1.47	1.47	1.47	1.47	1.47	1.47	1.47	1.47	1.47	1.47	1.47	1.47	1.47	1.47	1.63	1.47	1.47	1.47	1.97	1.47	1.63	1.47	1.63	1.63	1.47	3.66	1.47	1.47	3.66	1.80	3.84	3.66	1.47	3.72	4.04	3.66	3.66	3.66	3.66	3.66	3.66	3.66	3.66
			121	TUR35 Leporinus piau Turiacu	2.98	2.98	2.98	2.98	2.98	2.98	2.98	2.98	2.98	2.98	2.98	2.98	2.98	2.98	2.98	2.98	3.15	2.98	2.98	2.98	2.98	2.98	3.15	2.98	3.15	3.15	2.98	1.64	2.98	2.98	1.64	2.30	1.80	1.64	2.98	1.66	1.89	1.64	1.64	1.64	1.64	1.64	1.64	1.64	1.64
			122	TUR36 Leporinus piau Turiacu	2.98	2.98	2.98	2.98	2.98	2.98	2.98	2.98	2.98	2.98	2.98	2.98	2.98	2.98	2.98	2.98	3.15	2.98	2.98	2.98	2.98	2.98	3.15	2.98	3.15	3.15	2.98	1.64	2.98	2.98	1.64	2.30	1.80	1.64	2.98	1.66	1.89	1.64	1.64	1.64	1.64	1.64	1.64	1.64	1.64
			123	TUR37 Leporinus piau Turiacu	2.98	2.98	2.98	2.98	2.98	2.98	2.98	2.98	2.98	2.98	2.98	2.98	2.98	2.98	2.98	2.98	3.15	2.98	2.98	2.98	2.98	2.98	3.15	2.98	3.15	3.15	2.98	1.64	2.98	2.98	1.64	2.30	1.80	1.64	2.98	1.66	1.89	1.64	1.64	1.64	1.64	1.64	1.64	1.64	1.64
			124	TUR38 Leporinus piau Turiacu	2.98	2.98	2.98	2.98	2.98	2.98	2.98	2.98	2.98	2.98	2.98	2.98	2.98	2.98	2.98	2.98	3.15	2.98	2.98	2.98	2.98	2.98	3.15	2.98	3.15	3.15	2.98	1.64	2.98	2.98	1.64	2.30	1.80	1.64	2.98	1.66	1.89	1.64	1.64	1.64	1.64	1.64	1.64	1.64	1.64
			125	TUR46 Leporinus piau Turiacu	2.98	2.98	2.98	2.98	2.98	2.98	2.98	2.98	2.98	2.98	2.98	2.98	2.98	2.98	2.98	2.98	3.15	2.98	2.98	2.98	2.98	2.98	3.15	2.98	3.15	3.15	2.98	1.64	2.98	2.98	1.64	2.30	1.80	1.64	2.98	1.66	1.89	1.64	1.64	1.64	1.64	1.64	1.64	1.64	1.64
			126	TUR256 Leporinus piau Turiacu	3.50	3.50	3.50	3.50	3.50	3.50	3.50	3.50	3.50	3.50	3.50	3.50	3.50	3.50	3.50	3.50	3.67	3.50	3.50	3.50	3.16	3.50	3.76	3.50	3.76	3.67	3.50	1.14	3.50	3.50	1.14	2.48	1.30	1.14	3.50	1.16	1.37	1.14	1.14	1.14	1.14	1.14	1.14	1.14	1.14
			127	TUR257 Leporinus piau Turiacu	3.33	3.33	3.33	3.33	3.33	3.33	3.33	3.33	3.33	3.33	3.33	3.33	3.33	3.33	3.33	3.33	3.50	3.33	3.33	3.33	2.99	3.33	3.50	3.33	3.50	3.50	3.33	1.30	3.33	3.33	1.30	2.31	1.47	1.30	3.33	1.32	1.55	1.30	1.30	1.30	1.30	1.30	1.30	1.30	1.30
			128	TUR258 Leporinus piau Turiacu	3.50	3.50	3.50	3.50	3.50	3.50	3.50	3.50	3.50	3.50	3.50	3.50	3.50	3.50	3.50	3.50	3.67	3.50	3.50	3.50	3.16	3.50	3.76	3.50	3.76	3.67	3.50	1.14	3.50	3.50	1.14	2.48	1.30	1.14	3.50	1.16	1.37	1.14	1.14	1.14	1.14	1.14	1.14	1.14	1.14
			129	TUR262 Leporinus piau Turiacu	3.50	3.50	3.50	3.50	3.50	3.50	3.50	3.50	3.50	3.50	3.50	3.50	3.50	3.50	3.50	3.50	3.67	3.50	3.50	3.50	3.16	3.50	3.76	3.50	3.76	3.67	3.50	1.14	3.50	3.50	1.14	2.48	1.30	1.14	3.50	1.16	1.37	1.14	1.14	1.14	1.14	1.14	1.14	1.14	1.14
			130	TUR263 Leporinus piau Turiacu	3.50	3.50	3.50	3.50	3.50	3.50	3.50	3.50	3.50	3.50	3.50	3.50	3.50	3.50	3.50	3.50	3.67	3.50	3.50	3.50	3.16	3.50	3.76	3.50	3.76	3.67	3.50	1.14	3.50	3.50	1.14	2.48	1.30	1.14	3.50	1.16	1.37	1.14	1.14	1.14	1.14	1.14	1.14	1.14	1.14
			131	TUR264 Leporinus piau Turiacu	3.50	3.50	3.50	3.50	3.50	3.50	3.50	3.50	3.50	3.50	3.50	3.50	3.50	3.50	3.50	3.50	3.67	3.50	3.50	3.50	3.16	3.50	3.76	3.50	3.76	3.67	3.50	1.14	3.50	3.50	1.14	2.48	1.30	1.14	3.50	1.16	1.37	1.14	1.14	1.14	1.14	1.14	1.14	1.14	1.14
			132	MF664228 Leporinus cf friderici Amazonas2	3.55	3.55	3.55	3.55	3.55	3.55	3.55	3.55	3.55	3.55	3.55	3.55	3.55	3.55	3.55	3.55	3.72	3.55	3.55	3.55	3.20	3.55	3.73	3.55	3.73	3.72	3.55	1.16	3.55	3.55	1.16	2.51	1.32	1.16	3.55	1.16	1.39	1.16	1.16	1.16	1.16	1.16	1.16	1.16	1.16
			133	PERI01 Leporinus piau Peria	0.16	0.16	0.16	0.16	0.16	0.16	0.16	0.16	0.16	0.16	0.16	0.16	0.16	0.16	0.16	0.16	0.32	0.16	0.16	0.16	0.65	0.16	0.32	0.16	0.32	0.32	0.16	3.50	0.16	0.16	3.50	0.81	3.76	3.50	0.16	3.55	3.87	3.50	3.50	3.50	3.50	3.50	3.50	3.50	3.50
			134	PERI02 Leporinus piau Peria	0.32	0.32	0.32	0.32	0.32	0.32	0.32	0.32	0.32	0.32	0.32	0.32	0.32	0.32	0.32	0.32	0.49	0.32	0.32	0.32	0.81	0.32	0.48	0.32	0.48	0.49	0.32	3.76	0.32	0.32	3.76	0.98	3.85	3.76	0.32	3.73	4.05	3.76	3.76	3.76	3.76	3.76	3.76	3.76	3.76
			135	PRE01 Leporinus piau Preguicas	0.0	0.0	0.0	0.0	0.0	0.0	0.0	0.0	0.0	0.0	0.0	0.0	0.0	0.0	0.0	0.0	0.16	0.0	0.0	0.0	0.48	0.0	0.16	0.0	0.16	0.16	0.0	3.76	0.0	0.0	3.76	0.98	3.85	3.76	0.0	3.73	4.05	3.76	3.76	3.76	3.76	3.76	3.76	3.76	3.76
			136	TO495 Leporinus venerei Tocantins	0.65	0.65	0.65	0.65	0.65	0.65	0.65	0.65	0.65	0.65	0.65	0.65	0.65	0.65	0.65	0.65	0.81	0.65	0.65	0.65	1.14	0.65	0.81	0.65	0.81	0.81	0.65	3.76	0.65	0.65	3.76	1.64	3.85	3.76	0.65	3.73	4.05	3.76	3.76	3.76	3.76	3.76	3.76	3.76	3.76
			137	TO493 Leporinus venerei Tocantins	0.85	0.85	0.85	0.85	0.85	0.85	0.85	0.85	0.85	0.85	0.85	0.85	0.85	0.85	0.85	0.85	1.02	0.85	0.85	0.85	1.37	0.85	1.02	0.85	1.02	1.02	0.85	3.84	0.85	0.85	3.84	1.72	4.03	3.84	0.85	3.84	4.07	3.84	3.84	3.84	3.84	3.84	3.84	3.84	3.84
			138	TO496 Leporinus venerei Tocantins	1.02	1.02	1.02	1.02	1.02	1.02	1.02	1.02	1.02	1.02	1.02	1.02	1.02	1.02	1.02	1.02	1.20	1.02	1.02	1.02	1.54	1.02	1.19	1.02	1.19	1.20	1.02	4.03	1.02	1.02	4.03	1.89	4.21	4.03	1.02	4.03	4.45	4.03	4.03	4.03	4.03	4.03	4.03	4.03	4.03
			139	TO548 Leporinus venerei Tocantins	0.68	0.68	0.68	0.68	0.68	0.68	0.68	0.68	0.68	0.68	0.68	0.68	0.68	0.68	0.68	0.68	0.85	0.68	0.68	0.68	1.19	0.68	0.85	0.68	0.85	0.85	0.68	3.67	0.68	0.68	3.67	1.54	3.85	3.67	0.68	3.67	4.07	3.67	3.67	3.67	3.67	3.67	3.67	3.67	3.67
			140	KF569001 Leporinus venerei Araguaia	0.82	0.82	0.82	0.82	0.82	0.82	0.82	0.82	0.82	0.82	0.82	0.82	0.82	0.82	0.82	0.82	0.99	0.82	0.82	0.82	1.32	0.82	0.99	0.82	0.99	0.99	0.82	3.55	0.82	0.82	3.55	1.49	3.73	3.55	0.82	3.55	3.93	3.55	3.55	3.55	3.55	3.55	3.55	3.55	3.55
			141	PALEP03 Leporinus piau Parnaiba	7.60	7.60	7.60	7.60	7.60	7.60	7.60	7.60	7.60	7.60	7.60	7.60	7.60	7.60	7.60	7.60	7.77	7.60	7.60	7.60	7.77	7.60	7.40	7.60	7.40	7.77	7.60	7.58	7.60	7.60	7.58	7.22	7.77	7.58	7.60	8.08	7.62	7.58	7.58	7.58	7.58	7.58	7.58	7.58	7.58
			142	PALEP05 Leporinus piau Parnaiba	7.60	7.60	7.60	7.60	7.60	7.60	7.60	7.60	7.60	7.60	7.60	7.60	7.60	7.60	7.60	7.60	7.77	7.60	7.60	7.60	7.77	7.60	7.40	7.60	7.40	7.77	7.60	7.58	7.60	7.60	7.58	7.22	7.77	7.58	7.60	8.08	7.62	7.58	7.58	7.58	7.58	7.58	7.58	7.58	7.58
			143	LEP98 Leporinus piau MZUSP110830 Mearim	7.97	7.97	7.97	7.97	7.97	7.97	7.97	7.97	7.97	7.97	7.97	7.97	7.97	7.97	7.97	7.97	8.14	7.97	7.97	7.97	8.15	7.97	7.77	7.97	7.77	8.14	7.97	8.33	7.97	7.97	8.33	7.60	8.52	8.33	7.97	8.85	8.60	8.33	8.33	8.33	8.33	8.33	8.33	8.33	8.33
			144	FJ418763 Leporinus piau Amazonas	7.55	7.55	7.55	7.55	7.55	7.55	7.55	7.55	7.55	7.55	7.55	7.55	7.55	7.55	7.55	7.55	7.73	7.55	7.55	7.55	7.73	7.55	7.36	7.55	7.36	7.73	7.55	7.92	7.55	7.55	7.92	7.17	8.11	7.92	7.55	8.30	8.17	7.92	7.92	7.92	7.92	7.92	7.92	7.92	7.92
			145	HM906024 leporinus piau Sao Francisco	7.93	7.93	7.93	7.93	7.93	7.93	7.93	7.93	7.93	7.93	7.93	7.93	7.93	7.93	7.93	7.93	8.11	7.93	7.93	7.93	8.12	7.93	7.74	7.93	7.74	8.11	7.93	8.30	7.93	7.93	8.30	7.55	8.49	8.30	7.93	8.68	8.57	8.30	8.30	8.30	8.30	8.30	8.30	8.30	8.30
			146	KM897440 Leporinus friderici Parana	7.58	7.58	7.58	7.58	7.58	7.58	7.58	7.58	7.58	7.58	7.58	7.58	7.58	7.58	7.58	7.58	7.76	7.58	7.58	7.58	7.78	7.58	7.39	7.58	7.39	7.76	7.58	7.95	7.58	7.58	7.95	7.01	8.14	7.95	7.58	8.34	8.21	7.95	7.95	7.95	7.95	7.95	7.95	7.95	7.95
			147	MZ051168 Leporinus friderici Tampok	7.02	7.02	7.02	7.02	7.02	7.02	7.02	7.02	7.02	7.02	7.02	7.02	7.02	7.02	7.02	7.02	7.20	7.02	7.02	7.02	7.21	7.02	6.84	7.02	6.84	7.20	7.02	6.65	7.02	7.02	6.65	6.66	6.83	6.65	7.02	7.13	7.02	6.65	6.65	6.65	6.65	6.65	6.65	6.65	6.65
			148	KF568982 Leporinus friderici Parana	7.52	7.52	7.52	7.52	7.52	7.52	7.52	7.52	7.52	7.52	7.52	7.52	7.52	7.52	7.52	7.52	7.70	7.52	7.52	7.52	7.71	7.52	7.33	7.52	7.33	7.70	7.52	7.89	7.52	7.52	7.89	7.15	8.08	7.89	7.52	8.27	8.14	7.89	7.89	7.89	7.89	7.89	7.89	7.89	7.89
			149	TO640 Leporinus affinis Tocantins	11.99	11.99	11.99	11.99	11.99	11.99	11.99	11.99	11.99	11.99	11.99	11.99	11.99	11.99	11.99	11.99	12.18	11.99	11.99	11.99	12.63	11.99	11.99	11.99	11.99	12.18	11.99	12.18	11.99	11.99	12.18	12.20	11.97	12.18	11.99	12.39	12.94	12.18	12.18	12.18	12.18	12.18	12.18	12.18	12.18
			150	TO661 Leporinus affinis Tocantins	12.63	12.63	12.63	12.63	12.63	12.63	12.63	12.63	12.63	12.63	12.63	12.63	12.63	12.63	12.63	12.63	12.83	12.63	12.63	12.63	13.27	12.63	12.63	12.63	12.63	12.83	12.63	11.97	12.63	12.63	11.97	12.42	11.76	11.97	12.63	12.18	12.49	11.97	11.97	11.97	11.97	11.97	11.97	11.97	11.97
			151	TO603 Leporinus affinis Tocantins	12.63	12.63	12.63	12.63	12.63	12.63	12.63	12.63	12.63	12.63	12.63	12.63	12.63	12.63	12.63	12.63	12.83	12.63	12.63	12.63	12.85	12.63	12.63	12.63	12.63	12.83	12.63	11.97	12.63	12.63	11.97	12.42	11.76	11.97	12.63	12.18	12.71	11.97	11.97	11.97	11.97	11.97	11.97	11.97	11.97
			152	TO634 Leporinus affinis Tocantins	12.18	12.18	12.18	12.18	12.18	12.18	12.18	12.18	12.18	12.18	12.18	12.18	12.18	12.18	12.18	12.18	12.38	12.18	12.18	12.18	12.83	12.18	12.18	12.18	12.18	12.38	12.18	12.38	12.18	12.18	12.38	12.39	12.16	12.38	12.18	12.59	12.94	12.38	12.38	12.38	12.38	12.38	12.38	12.38	12.38
			153	TO636 Leporinus affinis Tocantins	11.99	11.99	11.99	11.99	11.99	11.99	11.99	11.99	11.99	11.99	11.99	11.99	11.99	11.99	11.99	11.99	12.18	11.99	11.99	11.99	12.63	11.99	11.99	11.99	11.99	12.18	11.99	12.18	11.99	11.99	12.18	12.20	11.97	12.18	11.99	12.39	12.94	12.18	12.18	12.18	12.18	12.18	12.18	12.18	12.18
			154	TO637 Leporinus affinis Tocantins	12.42	12.42	12.42	12.42	12.42	12.42	12.42	12.42	12.42	12.42	12.42	12.42	12.42	12.42	12.42	12.42	12.61	12.42	12.42	12.42	13.06	12.42	12.42	12.42	12.42	12.61	12.42	12.18	12.42	12.42	12.18	12.63	11.97	12.18	12.42	12.39	12.94	12.18	12.18	12.18	12.18	12.18	12.18	12.18	12.18
			155	TO638 Leporinus affinis Tocantins	11.99	11.99	11.99	11.99	11.99	11.99	11.99	11.99	11.99	11.99	11.99	11.99	11.99	11.99	11.99	11.99	12.18	11.99	11.99	11.99	12.63	11.99	11.99	11.99	11.99	12.18	11.99	12.18	11.99	11.99	12.18	12.20	11.97	12.18	11.99	12.39	12.94	12.18	12.18	12.18	12.18	12.18	12.18	12.18	12.18
			156	KY524536 Leporinus affinis Amazonas	11.98	11.98	11.98	11.98	11.98	11.98	11.98	11.98	11.98	11.98	11.98	11.98	11.98	11.98	11.98	11.98	12.16	11.98	11.98	11.98	12.18	11.98	11.98	11.98	11.98	12.16	11.98	11.96	11.98	11.98	11.96	11.98	11.76	11.96	11.98	12.36	12.66	11.96	11.96	11.96	11.96	11.96	11.96	11.96	11.96
			157	TO599 Leporinus unitaeniatus Tocantins	12.36	12.36	12.36	12.36	12.36	12.36	12.36	12.36	12.36	12.36	12.36	12.36	12.36	12.36	12.36	12.36	12.55	12.36	12.36	12.36	12.57	12.36	12.36	12.36	12.36	12.55	12.36	13.63	12.36	12.36	13.63	12.15	13.41	13.63	12.36	13.63	14.24	13.63	13.63	13.63	13.63	13.63	13.63	13.63	13.63
			158	TO600 Leporinus unitaeniatus Tocantins	12.36	12.36	12.36	12.36	12.36	12.36	12.36	12.36	12.36	12.36	12.36	12.36	12.36	12.36	12.36	12.36	12.55	12.36	12.36	12.36	12.57	12.36	12.36	12.36	12.36	12.55	12.36	13.63	12.36	12.36	13.63	12.15	13.41	13.63	12.36	13.63	14.24	13.63	13.63	13.63	13.63	13.63	13.63	13.63	13.63
			159	TO601 Leporinus unitaeniatus Tocantins	11.73	11.73	11.73	11.73	11.73	11.73	11.73	11.73	11.73	11.73	11.73	11.73	11.73	11.73	11.73	11.73	11.92	11.73	11.73	11.73	11.94	11.73	11.73	11.73	11.73	11.92	11.73	12.98	11.73	11.73	12.98	11.52	12.77	12.98	11.73	12.98	13.55	12.98	12.98	12.98	12.98	12.98	12.98	12.98	12.98
			160	TO602 Leporinus unitaeniatus Tocantins	11.94	11.94	11.94	11.94	11.94	11.94	11.94	11.94	11.94	11.94	11.94	11.94	11.94	11.94	11.94	11.94	12.13	11.94	11.94	11.94	12.15	11.94	11.94	11.94	11.94	12.13	11.94	13.19	11.94	11.94	13.19	11.73	12.98	13.19	11.94	13.19	13.78	13.19	13.19	13.19	13.19	13.19	13.19	13.19	13.19
			161	KF569000 Leporinus unitaeniatus Tocantins	11.93	11.93	11.93	11.93	11.93	11.93	11.93	11.93	11.93	11.93	11.93	11.93	11.93	11.93	11.93	11.93	12.12	11.93	11.93	11.93	12.14	11.93	11.93	11.93	11.93	12.12	11.93	12.94	11.93	11.93	12.94	11.93	12.74	12.94	11.93	12.94	13.49	12.94	12.94	12.94	12.94	12.94	12.94	12.94	12.94
			162	TO557 Leporinus maculatus Tocantins	10.31	10.31	10.31	10.31	10.31	10.31	10.31	10.31	10.31	10.31	10.31	10.31	10.31	10.31	10.31	10.31	10.50	10.31	10.31	10.31	10.52	10.31	10.31	10.31	10.31	10.50	10.31	9.49	10.31	10.31	9.49	10.31	9.29	9.49	10.31	9.89	9.99	9.49	9.49	9.49	9.49	9.49	9.49	9.49	9.49
			163	MZ051339 Leporinus maculatus Maroni	11.16	11.16	11.16	11.16	11.16	11.16	11.16	11.16	11.16	11.16	11.16	11.16	11.16	11.16	11.16	11.16	11.34	11.16	11.16	11.16	11.76	11.16	11.16	11.16	11.16	11.34	11.16	10.95	11.16	11.16	10.95	11.36	10.75	10.95	11.16	11.53	10.95	10.95	10.95	10.95	10.95	10.95	10.95	10.95	10.95
			164	PALEP01 Leporinus piau Parnaiba	14.41	14.41	14.41	14.41	14.41	14.41	14.41	14.41	14.41	14.41	14.41	14.41	14.41	14.41	14.41	14.41	14.39	14.41	14.41	14.41	14.62	14.41	14.41	14.41	14.41	14.39	14.41	15.65	14.41	14.41	15.65	14.62	15.86	15.65	14.41	16.13	15.93	15.65	15.65	15.65	15.65	15.65	15.65	15.65	15.65
			165	PALEP04 Leporinus piau Parnaiba	14.42	14.42	14.42	14.42	14.42	14.42	14.42	14.42	14.42	14.42	14.42	14.42	14.42	14.42	14.42	14.42	14.41	14.42	14.42	14.42	14.64	14.42	14.42	14.42	14.42	14.41	14.42	15.67	14.42	14.42	15.67	14.64	15.88	15.67	14.42	16.15	15.93	15.67	15.67	15.67	15.67	15.67	15.67	15.67	15.67
			166	PALEP06 Leporinus piau Parnaiba	14.41	14.41	14.41	14.41	14.41	14.41	14.41	14.41	14.41	14.41	14.41	14.41	14.41	14.41	14.41	14.41	14.39	14.41	14.41	14.41	14.62	14.41	14.41	14.41	14.41	14.39	14.41	15.65	14.41	14.41	15.65	14.62	15.86	15.65	14.41	16.13	15.93	15.65	15.65	15.65	15.65	15.65	15.65	15.65	15.65
			167	PALEP08 Leporinus piau Parnaiba	14.41	14.41	14.41	14.41	14.41	14.41	14.41	14.41	14.41	14.41	14.41	14.41	14.41	14.41	14.41	14.41	14.39	14.41	14.41	14.41	14.62	14.41	14.41	14.41	14.41	14.39	14.41	15.65	14.41	14.41	15.65	14.62	15.86	15.65	14.41	16.13	15.93	15.65	15.65	15.65	15.65	15.65	15.65	15.65	15.65
			168	PALEP09 Leporinus piau Parnaiba	14.62	14.62	14.62	14.62	14.62	14.62	14.62	14.62	14.62	14.62	14.62	14.62	14.62	14.62	14.62	14.62	14.60	14.62	14.62	14.62	14.83	14.62	14.62	14.62	14.62	14.60	14.62	15.86	14.62	14.62	15.86	14.83	16.07	15.86	14.62	16.35	16.13	15.86	15.86	15.86	15.86	15.86	15.86	15.86	15.86
			169	PALEP13 Leporinus piau Parnaiba	14.41	14.41	14.41	14.41	14.41	14.41	14.41	14.41	14.41	14.41	14.41	14.41	14.41	14.41	14.41	14.41	14.39	14.41	14.41	14.41	14.62	14.41	14.41	14.41	14.41	14.39	14.41	15.65	14.41	14.41	15.65	14.62	15.86	15.65	14.41	16.13	15.93	15.65	15.65	15.65	15.65	15.65	15.65	15.65	15.65
			170	PALEP14 Leporinus piau Parnaiba	14.41	14.41	14.41	14.41	14.41	14.41	14.41	14.41	14.41	14.41	14.41	14.41	14.41	14.41	14.41	14.41	14.39	14.41	14.41	14.41	14.62	14.41	14.41	14.41	14.41	14.39	14.41	15.65	14.41	14.41	15.65	14.62	15.86	15.65	14.41	16.13	15.93	15.65	15.65	15.65	15.65	15.65	15.65	15.65	15.65
			171	PALEP15 Leporinus piau Parnaiba	14.41	14.41	14.41	14.41	14.41	14.41	14.41	14.41	14.41	14.41	14.41	14.41	14.41	14.41	14.41	14.41	14.39	14.41	14.41	14.41	14.62	14.41	14.41	14.41	14.41	14.39	14.41	15.65	14.41	14.41	15.65	14.62	15.86	15.65	14.41	16.13	15.93	15.65	15.65	15.65	15.65	15.65	15.65	15.65	15.65
			172	PALEP16 Leporinus piau Parnaiba	14.41	14.41	14.41	14.41	14.41	14.41	14.41	14.41	14.41	14.41	14.41	14.41	14.41	14.41	14.41	14.41	14.39	14.41	14.41	14.41	14.62	14.41	14.41	14.41	14.41	14.39	14.41	15.65	14.41	14.41	15.65	14.62	15.86	15.65	14.41	16.13	15.93	15.65	15.65	15.65	15.65	15.65	15.65	15.65	15.65
			173	PALEP18 Leporinus piau Parnaiba	14.41	14.41	14.41	14.41	14.41	14.41	14.41	14.41	14.41	14.41	14.41	14.41	14.41	14.41	14.41	14.41	14.39	14.41	14.41	14.41	14.62	14.41	14.41	14.41	14.41	14.39	14.41	15.65	14.41	14.41	15.65	14.62	15.86	15.65	14.41	16.13	15.93	15.65	15.65	15.65	15.65	15.65	15.65	15.65	15.65
			174	PALEP19 Leporinus piau Parnaiba	14.62	14.62	14.62	14.62	14.62	14.62	14.62	14.62	14.62	14.62	14.62	14.62	14.62	14.62	14.62	14.62	14.60	14.62	14.62	14.62	14.83	14.62	14.62	14.62	14.62	14.60	14.62	15.86	14.62	14.62	15.86	14.83	16.07	15.86	14.62	16.35	15.93	15.86	15.86	15.86	15.86	15.86	15.86	15.86	15.86
			175	PALEP20 Leporinus piau Parnaiba	14.41	14.41	14.41	14.41	14.41	14.41	14.41	14.41	14.41	14.41	14.41	14.41	14.41	14.41	14.41	14.41	14.39	14.41	14.41	14.41	14.62	14.41	14.41	14.41	14.41	14.39	14.41	15.65	14.41	14.41	15.65	14.62	15.86	15.65	14.41	16.13	15.93	15.65	15.65	15.65	15.65	15.65	15.65	15.65	15.65
			176	PALEP21 Leporinus piau Parnaiba	14.62	14.62	14.62	14.62	14.62	14.62	14.62	14.62	14.62	14.62	14.62	14.62	14.62	14.62	14.62	14.62	14.60	14.62	14.62	14.62	14.83	14.62	14.62	14.62	14.62	14.60	14.62	15.86	14.62	14.62	15.86	14.83	16.07	15.86	14.62	16.35	15.93	15.86	15.86	15.86	15.86	15.86	15.86	15.86	15.86
			177	PALEP22 Leporinus piau Parnaiba	14.41	14.41	14.41	14.41	14.41	14.41	14.41	14.41	14.41	14.41	14.41	14.41	14.41	14.41	14.41	14.41	14.39	14.41	14.41	14.41	14.62	14.41	14.41	14.41	14.41	14.39	14.41	15.65	14.41	14.41	15.65	14.62	15.86	15.65	14.41	16.13	15.93	15.65	15.65	15.65	15.65	15.65	15.65	15.65	15.65
			178	PALEP23 Leporinus piau Parnaiba	14.41	14.41	14.41	14.41	14.41	14.41	14.41	14.41	14.41	14.41	14.41	14.41	14.41	14.41	14.41	14.41	14.39	14.41	14.41	14.41	14.62	14.41	14.41	14.41	14.41	14.39	14.41	15.65	14.41	14.41	15.65	14.62	15.86	15.65	14.41	16.13	15.93	15.65	15.65	15.65	15.65	15.65	15.65	15.65	15.65
			179	PALEP25 Leporinus piau Parnaiba	14.41	14.41	14.41	14.41	14.41	14.41	14.41	14.41	14.41	14.41	14.41	14.41	14.41	14.41	14.41	14.41	14.39	14.41	14.41	14.41	14.62	14.41	14.41	14.41	14.41	14.39	14.41	15.65	14.41	14.41	15.65	14.62	15.86	15.65	14.41	16.13	15.93	15.65	15.65	15.65	15.65	15.65	15.65	15.65	15.65
			180	HM405028 Megaleporinus elongatus São Francisco	14.33	14.33	14.33	14.33	14.33	14.33	14.33	14.33	14.33	14.33	14.33	14.33	14.33	14.33	14.33	14.33	14.30	14.33	14.33	14.33	14.54	14.33	14.33	14.33	14.33	14.30	14.33	15.89	14.33	14.33	15.89	14.54	15.80	15.89	14.33	15.80	15.87	15.89	15.89	15.89	15.89	15.89	15.89	15.89	15.89
			181	KU134862 Megaleporinus cf. obtusidens Sao Francisco	14.46	14.46	14.46	14.46	14.46	14.46	14.46	14.46	14.46	14.46	14.46	14.46	14.46	14.46	14.46	14.46	14.44	14.46	14.46	14.46	14.67	14.46	14.46	14.46	14.46	14.44	14.46	15.72	14.46	14.46	15.72	14.67	15.93	15.72	14.46	15.93	16.00	15.72	15.72	15.72	15.72	15.72	15.72	15.72	15.72
			182	MN731315 Megaleporinus gaieiro Contas	14.46	14.46	14.46	14.46	14.46	14.46	14.46	14.46	14.46	14.46	14.46	14.46	14.46	14.46	14.46	14.46	14.44	14.46	14.46	14.46	15.09	14.46	14.46	14.46	14.46	14.44	14.46	16.15	14.46	14.46	16.15	15.09	16.37	16.15	14.46	16.37	16.46	16.15	16.15	16.15	16.15	16.15	16.15	16.15	16.15
[truncated: 137 more columns]
